# Supplementary material
Source: Springer Nature journal article supplement (https://www.springermedizin.de/resource/supplementary/12914_2009_76_MOESM2_ESM.pdf/9537462)

## Trends in OPD and admissions, Ghana, 2001-8

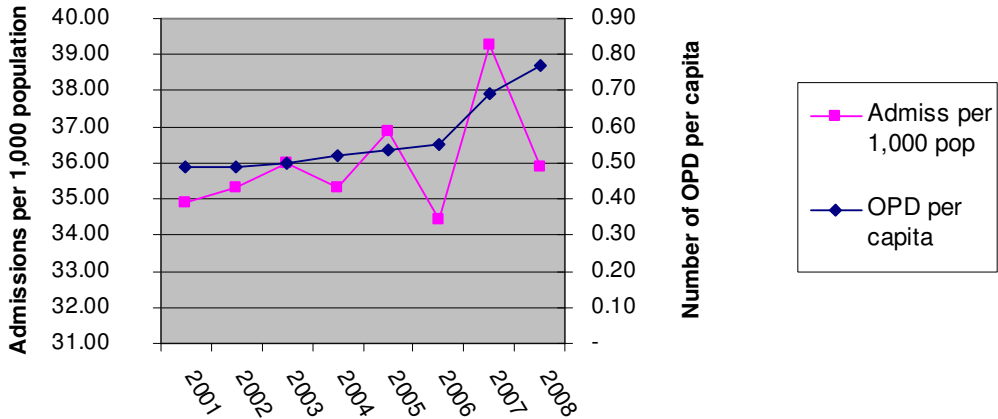

Supplement: MOESM2 [file 9537462]
